# Supplementary material for: The chromatin remodelers RSC and ISW1 display functional and chromatin-based promoter antagonism
Source: eLife journal article supplement (doi:10.7554/elife.06073), 2015-03-30
Supplement: supp [file elife-06073-supp-v1.zip]

Archive with 11 entries (11 files):
- elife_poa_e06073_Figure_2_figure_supplement_1.pdf
- elife_poa_e06073_Figure_3_figure_supplement_1.pdf
- elife_poa_e06073_Figure_4_figure_supplement_1.pdf
- elife_poa_e06073_Supplementary_File_1.docx
- elife_poa_e06073_Figure_4_figure_supplement_2.pdf
- elife_poa_e06073_Figure_1_figure_supplement_1.pdf
- elife_poa_e06073_Figure_5_figure_Supplement_1.pdf
- elife_poa_e06073_Figure_6_figure_supplement_2.pdf
- elife_poa_e06073_Supplementary_File_2.docx
- elife_poa_e06073_Figure_6_figure_supplement_1.pdf
- elife_poa_e06073_Figure_3_figure_supplement_2.pdf
