# Supplementary material for: The chromatin remodelers RSC and ISW1 display functional and chromatin-based promoter antagonism
Source: eLife journal article supplement (doi:10.7554/elife.06073), 2015-03-30
Supplement: supp [file elife-06073-supp-v1.zip › elife_poa_e06073_Figure_1_figure_supplement_1.pdf]

**A***DOT1+**dot1* $\Delta$ *DOT1+**dot1* $\Delta$ *RSC2**rsc2 V457M*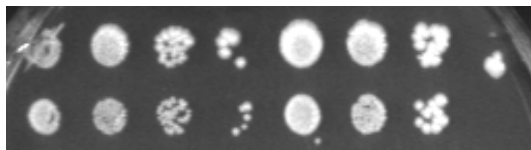

SC-TRP 30°C

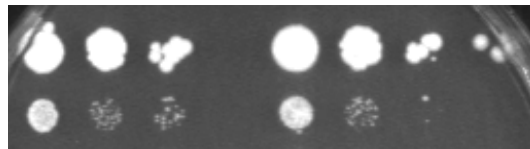

SC-TRP + 5FOA 30°C

**B***SIR3+**sir3* $\Delta$ *SIR3+**sir3* $\Delta$ *RSC2**rsc2 V457M*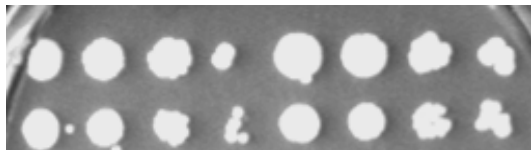

SC-TRP 30°C

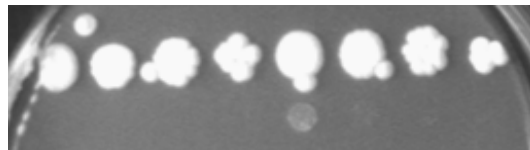

SC-TRP + 5FOA 30°C
