# Supplementary material for: The chromatin remodelers RSC and ISW1 display functional and chromatin-based promoter antagonism
Source: eLife journal article supplement (doi:10.7554/elife.06073), 2015-03-30
Supplement: supp [file elife-06073-supp-v1.zip › elife_poa_e06073_Figure_2_figure_supplement_1.pdf]

**A**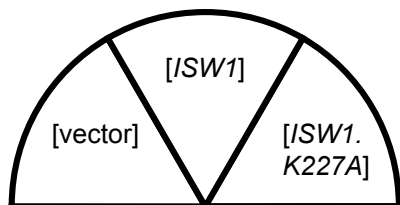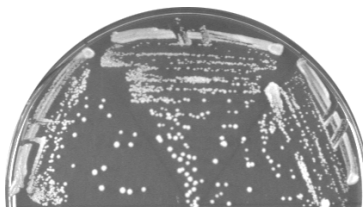

SC-URA 30°C

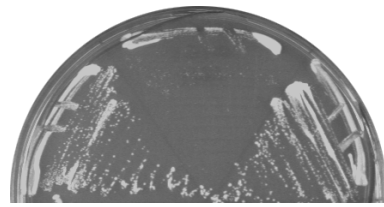

SC-URA 32°C

**B*****ISW2*<sup>+</sup>*****ISW2*<sup>Δ</sup>***RSC2**rsc2 V457M**rsc2 D461G*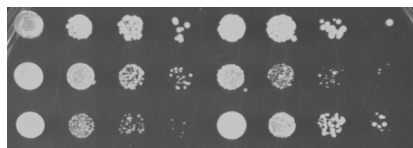

SC-TRP 30°C

*RSC2**rsc2 V457M**rsc2 D461G*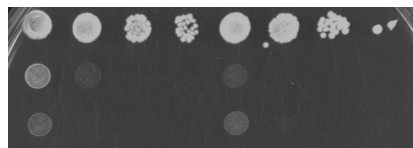

SC-TRP 32°C

*RSC2**rsc2 V457M**rsc2 D461G*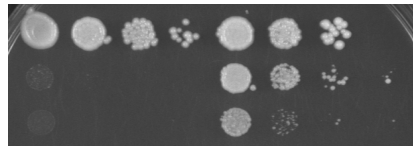

YPD +12 μg/ml Benomyl

**C**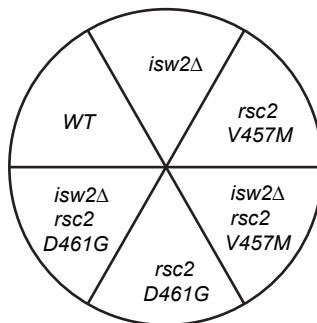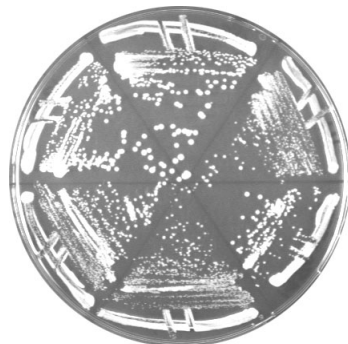

SC-URA

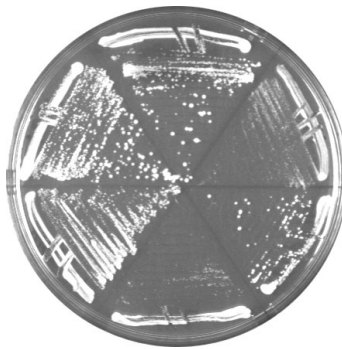

SC-URA + 150μg/ml 6AU

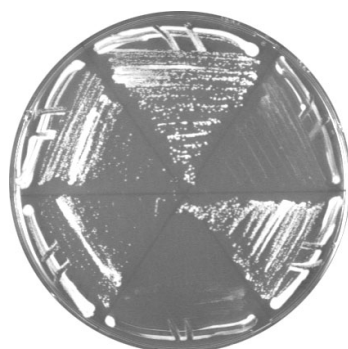

SC-URA + 20μg/ml MPA
