# Supplementary figures and images for: The chromatin remodelers RSC and ISW1 display functional and chromatin-based promoter antagonism
Source: eLife journal article supplement (doi:10.7554/elife.06073), 2015-03-30

**A**

Rsc8 MA      Rsc8 Seq      Sth1 Seq

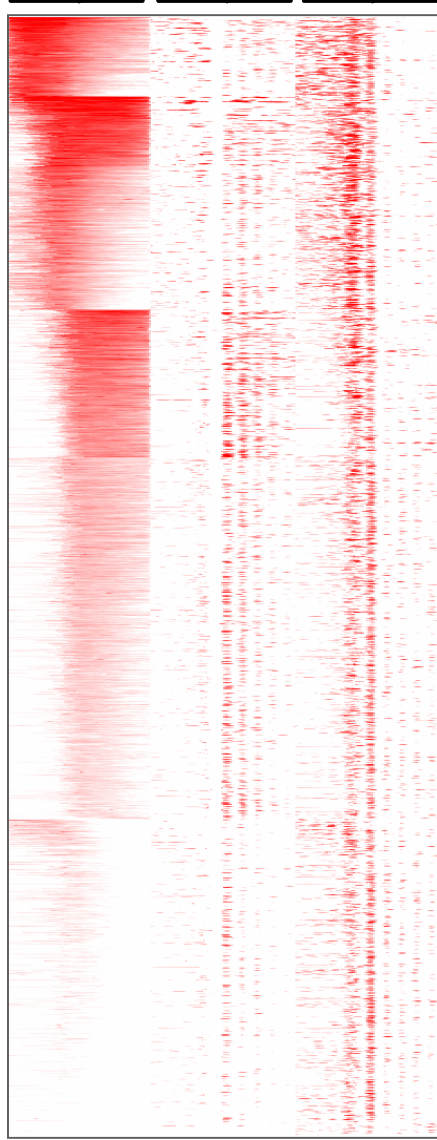**B**

loc3 MA      loc3 Seq

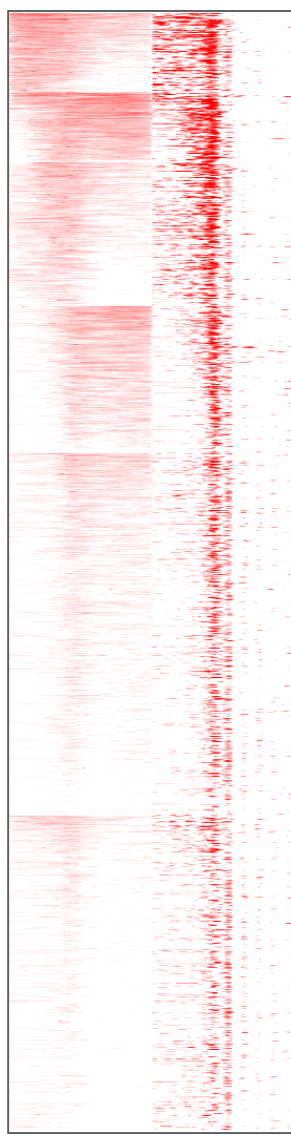**C**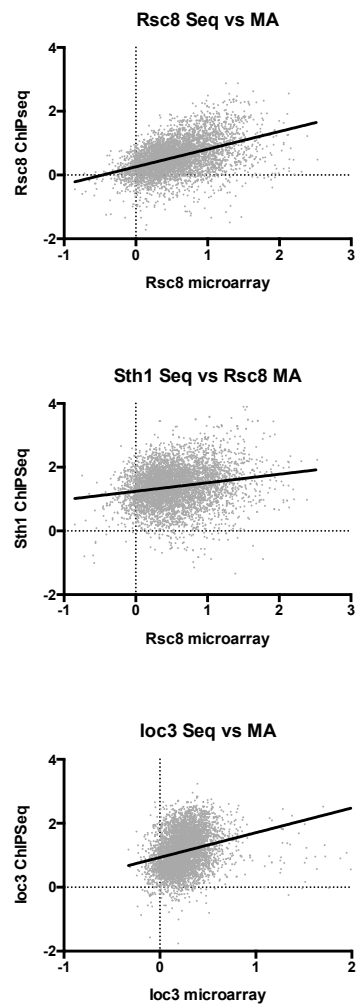

Supplement: supp [file elife-06073-supp-v1.zip › elife_poa_e06073_Figure_4_figure_supplement_1.pdf]

**A**Genes suppressed by *ioc3* $\Delta$ 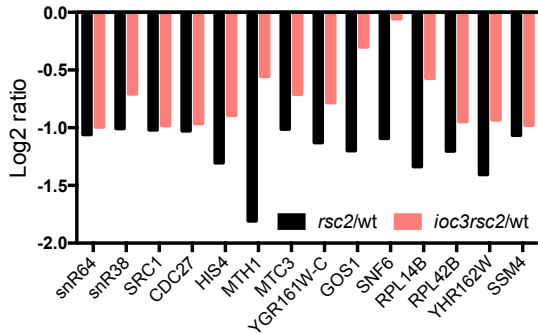**B**Genes suppressed by *isw1* $\Delta$ 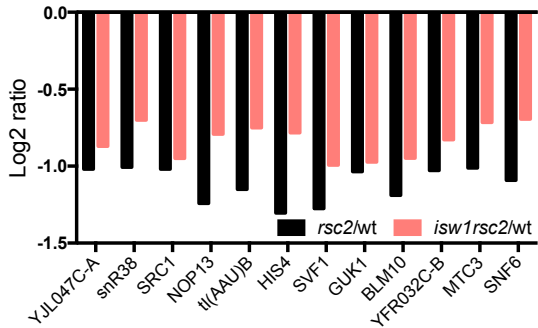

Supplement: supp [file elife-06073-supp-v1.zip › elife_poa_e06073_Figure_4_figure_supplement_2.pdf]

**A**

— *rscΔ ISW1*  
— *RSC ISW1*

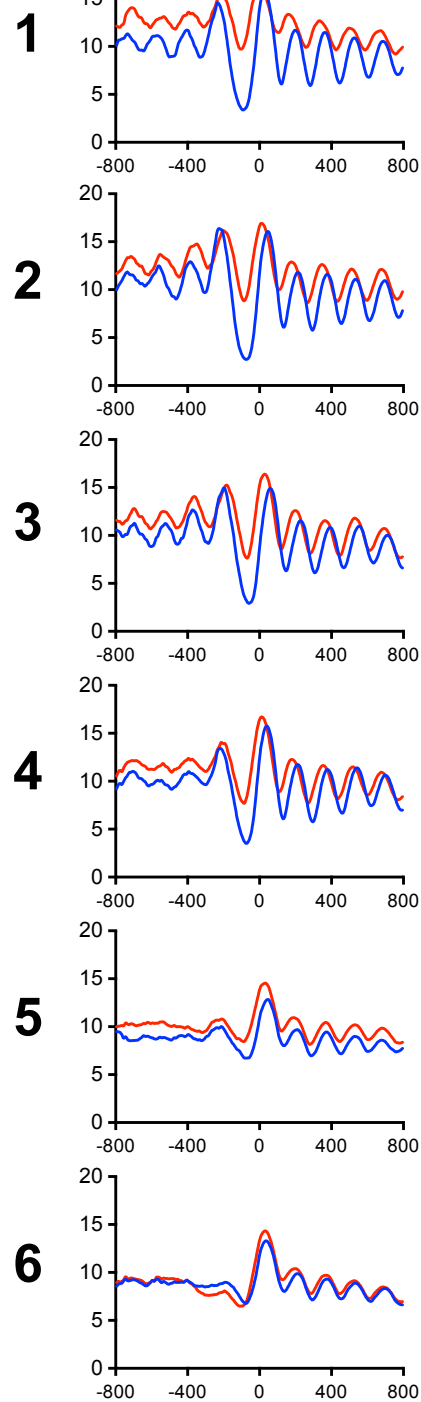**B**

— Predicted  
— *RSC ISW1*

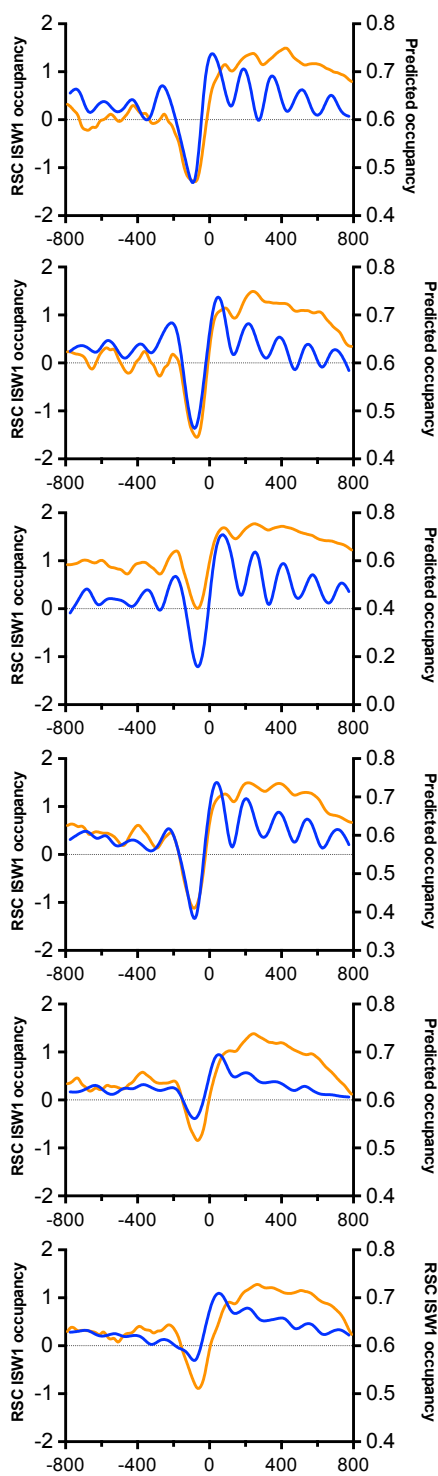

Supplement: supp [file elife-06073-supp-v1.zip › elife_poa_e06073_Figure_5_figure_Supplement_1.pdf]

**A**

Rsc8 Seq Occupancy

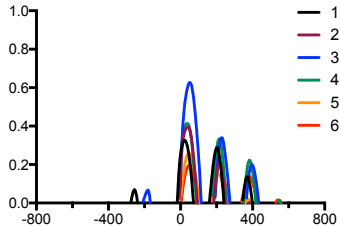**B**

Sth1 Seq Occupancy

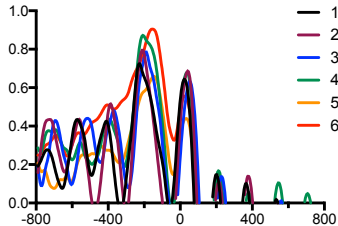**C**

Ioc3 Seq Occupancy

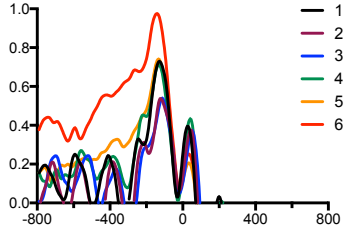

Supplement: supp [file elife-06073-supp-v1.zip › elife_poa_e06073_Figure_6_figure_supplement_2.pdf]

**A**

## Array Representation

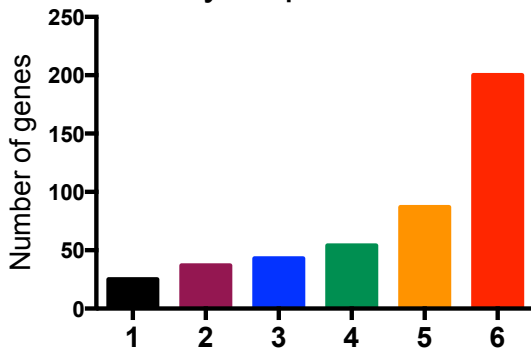**B**

## Parkhomchuk 2009

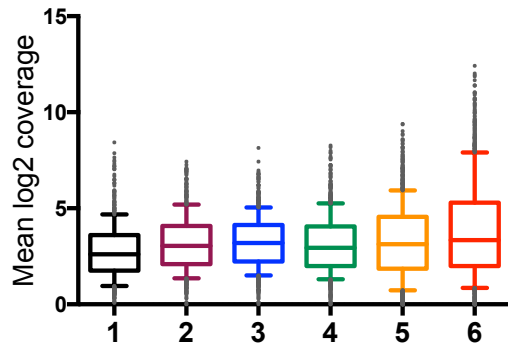**C**

## Nagalakshmi 2008

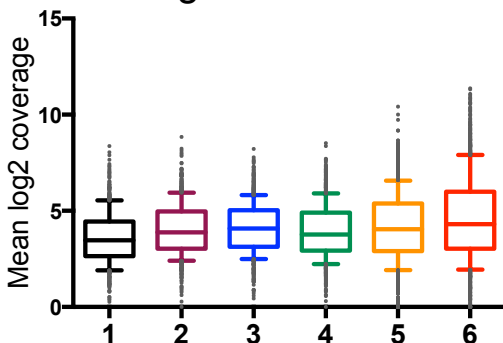**D**

## Xu 2008

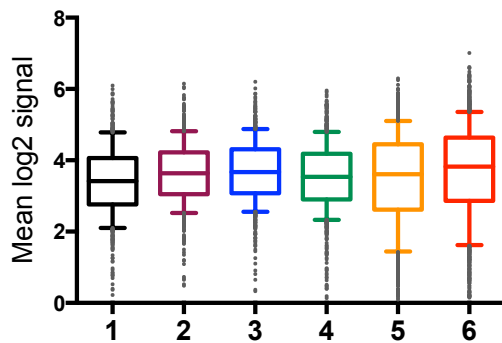

Supplement: supp [file elife-06073-supp-v1.zip › elife_poa_e06073_Figure_6_figure_supplement_1.pdf]

**A**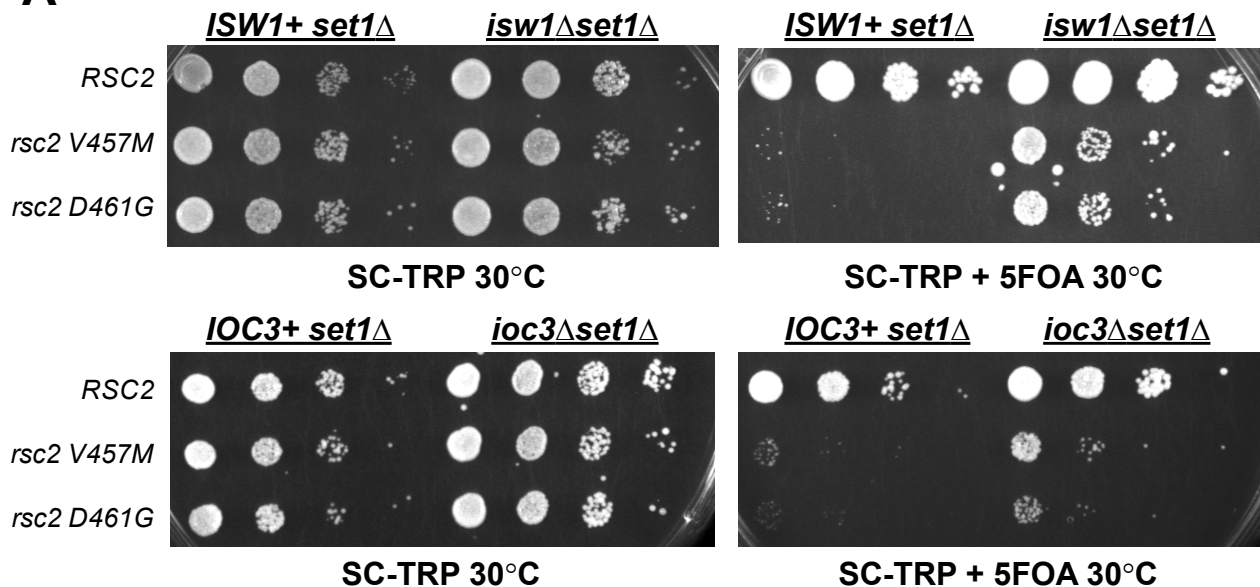**B**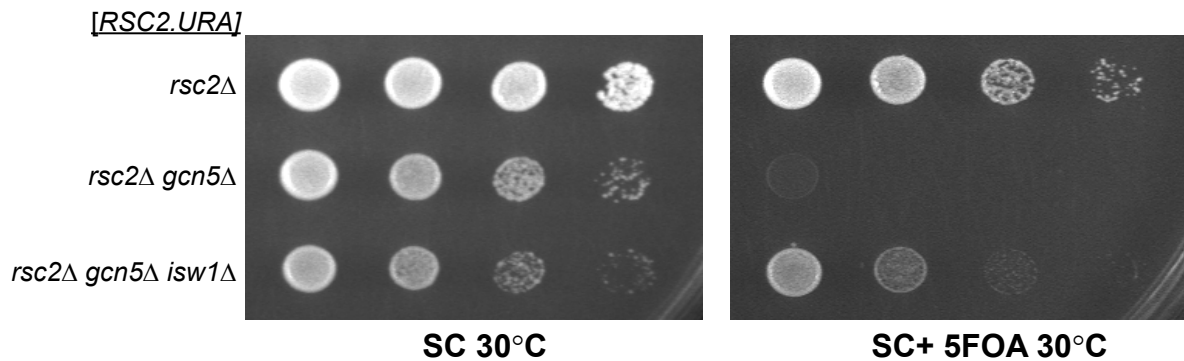

Supplement: supp [file elife-06073-supp-v1.zip › elife_poa_e06073_Figure_3_figure_supplement_2.pdf]

**A***DOT1+**dot1*Δ*DOT1+**dot1*Δ*RSC2**rsc2 V457M*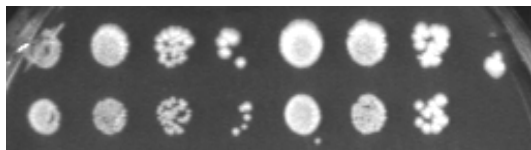

SC-TRP 30°C

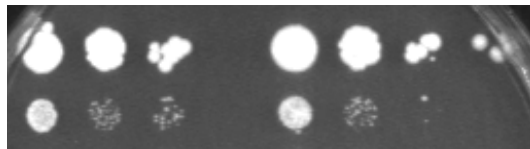

SC-TRP + 5FOA 30°C

**B***SIR3+**sir3*Δ*SIR3+**sir3*Δ*RSC2**rsc2 V457M*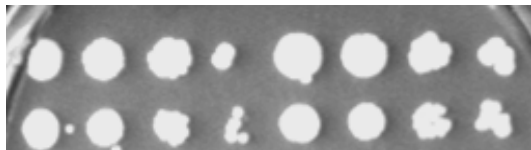

SC-TRP 30°C

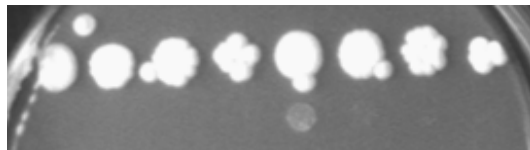

SC-TRP + 5FOA 30°C

Supplement: supp [file elife_poa_e06073_Figure_1_figure_supplement_1.pdf › elife_poa_e06073_Figure_1_figure_supplement_1.pdf]

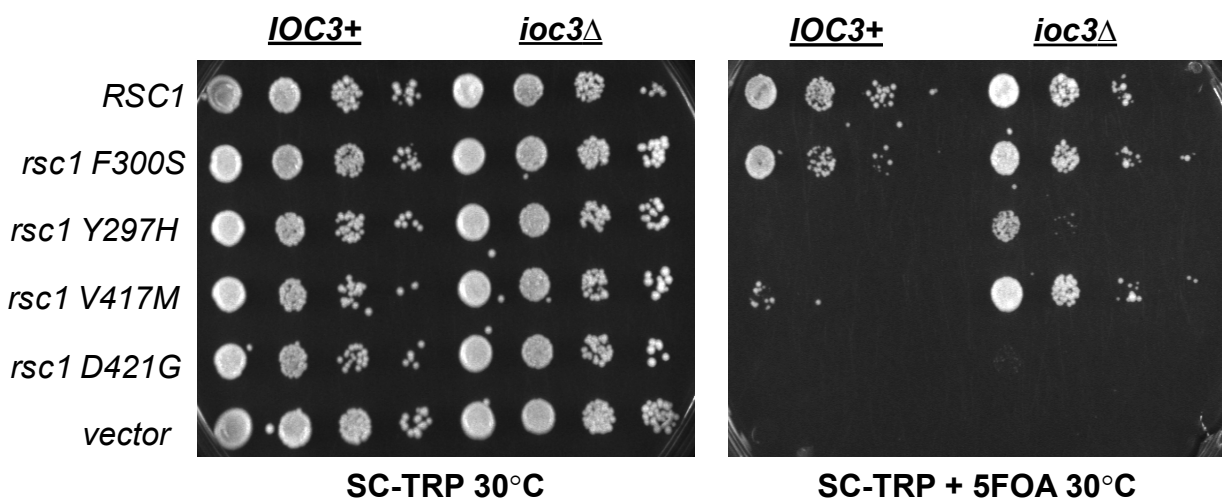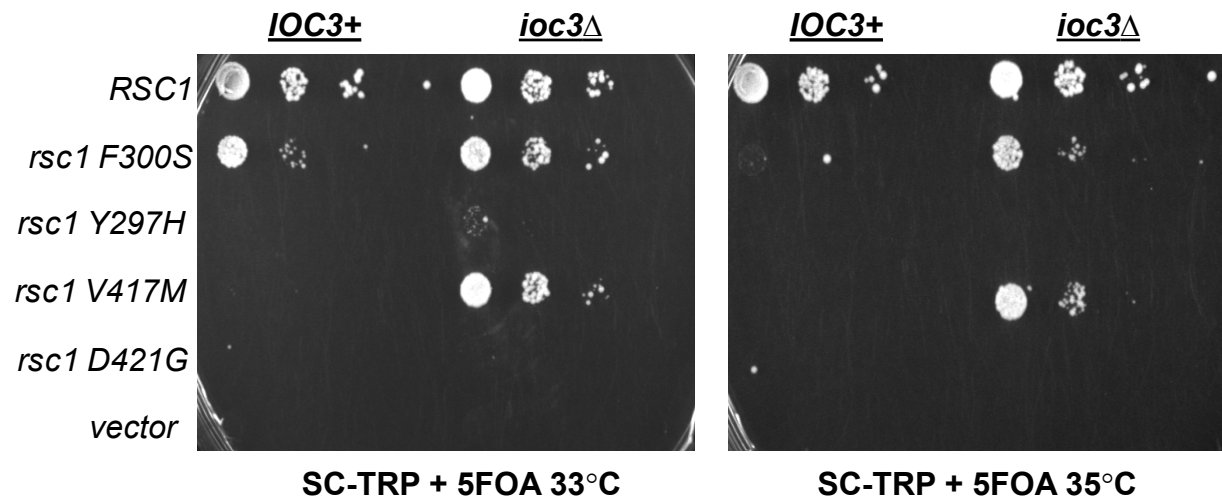

Supplement: supp [file elife_poa_e06073_Figure_3_figure_supplement_1.pdf › elife_poa_e06073_Figure_3_figure_supplement_1.pdf]
